# Supplementary material for: Subdivision of de-novo metastatic nasopharyngeal carcinoma based on tumor burden and pretreatment EBV DNA for therapeutic guidance of locoregional radiotherapy
Source: Springer Nature journal article supplement (doi:10.1186/s12885-021-08246-0), 2021-05-11

Figure S1: ROC curve analysis used to determine the cutoff value of pretreatment EBV DNA levels.

Sensitivity

1.0

0.8

0.6

0.4

0.2

0.0

0.0

0.2

0.4

0.6

0.8

1.0

Cut-off value = 24,600 copies/mL

Sensitivity = 0.689

Specificity = 0.573

AUC = 0.654 (95%CI = 0.594 - 0.715)

1-Specificity

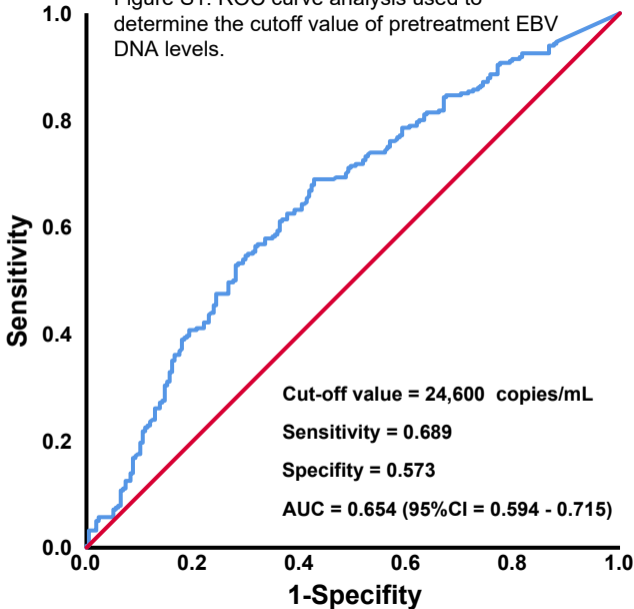

Supplement: MOESM1 [file 19154648]
